# Supplementary material for: A New Food Ingredient Rich in Bioaccessible (Poly)Phenols (and Glucosinolates) Obtained from Stabilized Broccoli Stalks
Source: MDPI journal article supplement (doi:10.3390/foods11121734), 2022-06-14
Supplement: s1 [file s1]

**Supplementary Table S1.** Qualitative HPLC-PDA-ESI/MSn analysis of the individual phenolic compounds present in analytical extracts and digestion products of pre-processed broccoli (*Brassica oleracea* var. *italica*) stalks.

Representative HPLC-PDA-ESI-MSn chromatogram of the intact broccoli stalks (black line), broccoli stalk's core (blue line), and broccoli stalk's bark (red line) recorded and 330 nm.

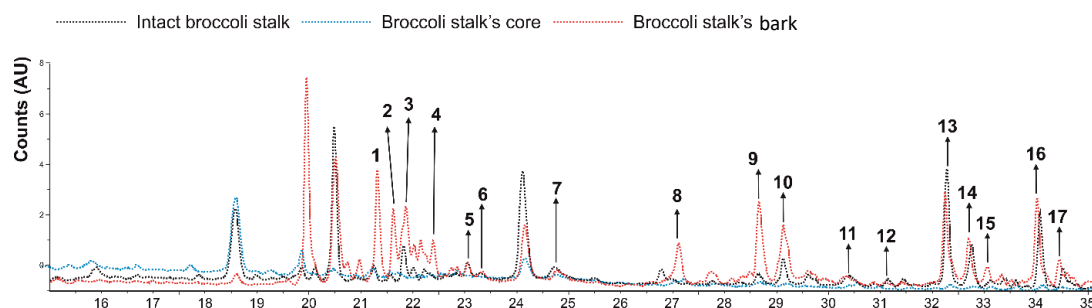

| Peak nº | Compound                                        | Retention time (min) | Parent Ion ( $m/z$ [M-H]) | Product Ions ( $m/z$ MSn[M-H]) |
|---------|-------------------------------------------------|----------------------|---------------------------|--------------------------------|
| 1       | 5-caffeoylquinic acid                           | 21.4                 | 353                       | 191,179                        |
| 2       | Caffeoyl derivative                             | 21.6                 | 306                       | 253,179                        |
| 3       | Caffeoyl-hexose derivative                      | 21.9                 | 421                       | 341,179                        |
| 4       | <i>p</i> -coumaroylquinic acid                  | 22.4                 | 337                       | 163,191                        |
| 5       | Synapoyl-gentibioside                           | 23.0                 | 547                       | 223,163                        |
| 6       | Synapoyl hexoside                               | 23.3                 | 385                       | 223,163                        |
| 7       | Feruloyl-caffeoyl derivative                    | 24.8                 | 551                       | 193,275,179                    |
| 8       | Di-sinapoyl-gentiobioside I                     | 27.1                 | 753                       | 529                            |
| 9       | 3-O-feruloylquinic acid                         | 28.8                 | 885                       | 723,499                        |
| 10      | Feruloyl-caffeoyl derivative                    | 29.2                 | 469                       | 193,275,179                    |
| 11      | Di-sinapoyl-diglucose                           | 30.4                 | 753                       | 591                            |
| 12      | Di-caffeoylquinic acid derivative               | 31.2                 | 739                       | 515,275                        |
| 13      | Di-sinapoyl-gentibioside II                     | 32.3                 | 753                       | 529                            |
| 14      | 1-di-sinapoyl-2-feruloyl-gentiobioside          | 32.8                 | 723                       | 499,223                        |
| 15      | 1-di-sinapoyl-2-feruloyl-gentiobioside (isomer) | 33.1                 | 723                       | 499,223                        |
| 16      | 1,2,2'-tri-sinapoyl-gentiobioside               | 34.2                 | 959                       | 735, 205,511,529               |
| 17      | 1,2'-di-sinapoyl-2-feruloyl-gentiobioside       | 34.6                 | 929                       | 705,511,222,529                |

**Supplementary Table S2.** Qualitative HPLC-PDA-ESI/MSn analysis of the aliphatic, aromatic, and indolic glucosinolates present in analytical extracts and digestion products of pre-processed broccoli (*Brassica oleracea* var. *italica*) stalks.

Representative HPLC-PDA-ESI-MSn chromatogram of the intact broccoli stalks (black line), broccoli stalk's core (blue line), and broccoli stalk's bark (red line) recorded and 227 nm.

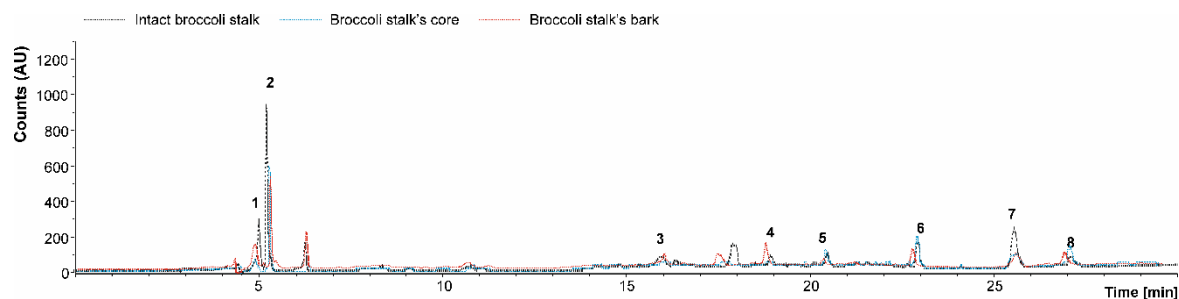

| Peak n° | Compound                     | Glucosinolate type | Retention time (min) | Parent Ion ( $m/z$ [M-H]) | Product Ions ( $m/z$ MSn[M-H]) |
|---------|------------------------------|--------------------|----------------------|---------------------------|--------------------------------|
| 1       | Glucoiberin (GI)             | Aliphatic          | 5.3                  | 422                       | 259, 97                        |
| 2       | Glucoraphanin (GR)           | Aliphatic          | 6.0                  | 436                       | 372, 259, 97                   |
| 3       | Hydroxy-glucobrassicin HGB)  | Indolic            | 16.2                 | 463                       | 285, 241, 97                   |
| 4       | Glucoerucin (GE)             | Aliphatic          | 18.9                 | 420                       | 259, 97                        |
| 5       | Glucobrassicin (GB)          | Indolic            | 20.5                 | 447                       | 404, 259, 97                   |
| 6       | Gluconasturtiin (PE)         | Aromatic           | 23.0                 | 422                       | 259, 97                        |
| 7       | Methoxy-glucobrassicin (MGB) | Indolic            | 25.6                 | 477                       | 259, 97                        |
| 8       | Neo-Glucobrassicin (NGB)     | Indolic            | 27.8                 | 477                       | 446, 259, 97                   |

**Supplementary Table S3.** Fragmentation patterns monitored by UHPLC-ESI-QqQ-MS/MS for the identification and quantification of glucosinolates breakdown products present in analytical extracts and digestion products of pre-processed broccoli (*Brassica oleracea* var. *italica*) stalks.

Representative UHPLC-ESI-QqQ-MS/MS overlay chromatogram of the analytes monitored at the MRM quantification transitions

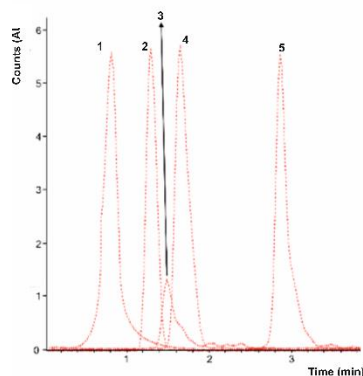

| Peak n° | Compound             | Retention time<br>(min) | MRM                     |                                |
|---------|----------------------|-------------------------|-------------------------|--------------------------------|
|         |                      |                         | quantitative transition | MRM<br>quantitative transition |
| 1       | Erucin               | 0.820                   | 141.0 > 59.0            | 161.0 > 70.0                   |
| 2       | Iberin               | 1.319                   | 164.0 > 105.0           | N.d.                           |
| 3       | Indole-3-Carbinol    | 1.500                   | 130.0 > 77.0            | 247.1 > 130.1                  |
| 4       | Sulforaphane         | 1.562                   | 178.0 > 114.0           | 178 > 71.0                     |
| 5       | 3,4-diindolylmethane | 2.922                   | 130.0 > 77.0            | 247.1 > 130.1                  |

ESI, electrospray ionization; MRM, multiple reaction monitoring; N.d., not determined.
